# 1 **Cryptic $\beta$ -lactamase evolution is driven by low $\beta$ -lactam concentrations**

2 Christopher Fröhlich<sup>a\*</sup>, João Alves Gama<sup>b</sup>, Klaus Harms<sup>b</sup>, Viivi H.A. Hirvonen<sup>c</sup>, Bjarte

3 Aarmo Lund<sup>a</sup>, Marc W. van der Kamp<sup>c</sup>, Pål Jarle Johnsen<sup>b</sup>, Ørjan Samuelsen<sup>b,d,#</sup> and

4 Hanna-Kirsti S. Leiros<sup>a,#</sup>

5 <sup>a</sup> The Norwegian Structural Biology Centre (NorStruct), Department of Chemistry, UiT

6 The Arctic University of Norway, Tromsø, Norway

7 <sup>b</sup> Department of Pharmacy, UiT The Arctic University of Norway, Tromsø, Norway

8 <sup>c</sup> School of Biochemistry, University of Bristol, Bristol, UK

9 <sup>d</sup> Norwegian National Advisory Unit on Detection of Antimicrobial Resistance,

10 Department of Microbiology and Infection Control, University Hospital of North

11 Norway, Tromsø, Norway

12

13 \*Corresponding author: christofrohlich@gmail.com

14 #These authors contributed equally

15

## 16 **ABSTRACT**

17 Our current understanding of how low antibiotic concentrations shape the evolution of

18 contemporary  $\beta$ -lactamases is limited. Using the wide-spread carbapenemase OXA-

19 48, we tested the long-standing hypothesis that selective compartments with low

20 antibiotic concentrations cause standing genetic diversity that could act as a gateway

21 to develop clinical resistance. Here, we subjected *Escherichia coli* expressing *bla*<sub>OXA-</sub>

22 48, on a clinical plasmid, to experimental evolution at sub-minimum inhibitory

23 concentrations (sub-MIC) of ceftazidime. We identified and characterized seven single

24 variants of OXA-48. Susceptibility profiles and dose-response curves showed that they

25 increased resistance only marginally. However, in competition experiments at sub-MIC

26 of ceftazidime, they showed strong selectable fitness benefits. Increased resistance  
27 was also reflected in elevated catalytic efficiencies towards ceftazidime. These  
28 changes are likely caused by enhanced flexibility of the  $\Omega$ - and  $\beta 5$ - $\beta 6$  loops. In  
29 conclusion, low-level concentrations of  $\beta$ -lactams can drive the evolution of  $\beta$ -  
30 lactamases through cryptic phenotypes which may act as stepping-stones towards  
31 clinical resistance.

## 32 **KEYWORDS**

33 OXA-48, ceftazidime, resistance development, cryptic evolution, *Escherichia coli*,  
34 carbapenemase, carbapenem, sub-MIC, structural flexibility, catalytic efficiency

## 35 **AUTHOR CONTRIBUTIONS**

36 CF, PJJ, ØS and HKSL worked out the conceptual framework. CF conducted the  
37 evolution. CF and JAG performed microbiological testing. CF, JAG and KH constructed  
38 strains. CF purified enzymes and measured kinetics. CF and HKSL solved the crystal  
39 structure. BAL performed initial molecular dynamic simulations as a proof of principle.  
40 VHAH and MWvdK designed, performed and analysed the molecular dynamic  
41 simulations. CF wrote the manuscript with contributions of all co-authors.

42

## 43 INTRODUCTION

44 Since the discovery of the first  $\beta$ -lactam, penicillin, this antibiotic class has diversified  
45 into a broad range of agents and it remains the most widely used class of antibiotics  
46 worldwide (Bush & Bradford, 2016). The extensive use of these agents has inevitably  
47 led to the selection of multiple resistance mechanisms where the expression of  $\beta$ -  
48 lactamase enzymes plays a major role, particularly in Gram-negative bacteria (Bush,  
49 2018). Consequently,  $\beta$ -lactamases are arguably among the most studied enzymes  
50 world-wide. Considerable progress has been made in understanding their molecular  
51 epidemiology and biochemical properties (Bonomo, 2017; Pitout et al., 2019). The  
52 evolutionary forces driving the diversification of these enzymes are however poorly  
53 understood. Already more than twenty years ago, it was proposed that sub-optimal  
54 antibiotic concentrations within the host fuel the evolution of  $\beta$ -lactamases, altering  
55 their substrate profiles (Baquero, 2001; Baquero & Negri, 1997; Baquero et al., 1997;  
56 Negri et al., 2000). This “compartment hypothesis” was later supported by a series of  
57 studies unequivocally demonstrating that selection for antibiotic resistance  
58 determinants can occur at very low antibiotic concentrations (Gullberg et al., 2014;  
59 Gullberg et al., 2011; Westhoff et al., 2017). Despite their clinical significance, few  
60 studies have investigated the effects of sub-minimum inhibitory concentrations (sub-  
61 MIC) of  $\beta$ -lactams on the evolution and selection of contemporary, globally circulating  
62  $\beta$ -lactamases (Bagge et al., 2004; Murray et al., 2018; Negri et al., 2000).

63 Within the last decade, OXA-48 has become one of the most widespread serine  
64  $\beta$ -lactamases. This Ambler class D  $\beta$ -lactamase confers resistance towards penicillins  
65 and decreases susceptibility to our last-resort drugs, the carbapenems. However, it is  
66 ineffective against extended-spectrum cephalosporins including ceftazidime (Docquier  
67 et al., 2009; Fröhlich et al., 2019; Poirel et al., 2004). Despite that, naturally occurring

68 OXA-48-like variants have been identified exhibiting increased ceftazidime activity but  
69 limited hydrolytic activity towards penicillins and carbapenems (e.g. OXA-163, OXA-  
70 247 and OXA-405) (Dortet et al., 2015; Gomez et al., 2013; Poirel et al., 2011).  
71 Ceftazidime resistance development in these variants was mostly due to single amino  
72 acid changes and a shortened  $\beta$ 5- $\beta$ 6 loop (Dortet et al., 2015; Gomez et al., 2013;  
73 Mairi et al., 2018; Pitout et al., 2019; Poirel et al., 2011). We previously showed that  
74 exposure to increasing concentrations of ceftazidime can select for this latent  
75 ceftazidimase function of OXA-48 in the laboratory (Fröhlich et al., 2019).

76 To test the long-standing hypothesis, that  $\beta$ -lactams at sub-MIC can drive the  
77 evolution of these enzymes, we subjected *Escherichia coli* MG1655 expressing OXA-  
78 48 to concentrations of ceftazidime below the MIC (0.25xMIC). Over the course of 300  
79 generations, we identified seven single variants of OXA-48 (L67F, P68S, F72L,  
80 F156C/V, L158P and G160C). Their ceftazidime MIC were indistinguishable or only  
81 marginally increased, compared to wild-type OXA-48. However, when expressed at  
82 sub-MIC of ceftazidime, all allele variants conferred strong fitness benefits. Measuring  
83 dose-response curves ( $IC_{50}$ ) and enzyme kinetics revealed further that (i) all genotypes  
84 decreased ceftazidime susceptibility significantly and (ii) all enzyme variants exhibited  
85 increased catalytic efficiencies against ceftazidime. Molecular dynamics (MD)  
86 simulations of P68S, F72L and L158P showed elevated flexibility of both the  $\Omega$ - (D143  
87 to I164) and  $\beta$ 5- $\beta$ 6 (T213 to K218) loops likely to aid hydrolysis of the bulkier  
88 ceftazidime by increasing active site accessibility. Structural investigations of L67F  
89 also revealed a novel binding site for the hydrolysed ceftazidime where the  $\beta$ 5- $\beta$ 6 loop  
90 was also involved in the product release. Worryingly, double mutants, such as  
91 F72I/G131 (OXA-D320, GenBank accession no. KJ620465) and N146S/L158P (OXA-  
92 D319, GenBank accession no. KJ620462), were recently identified in environmental

93 samples (Naas et al., 2017; Tacao et al., 2017) underlining the importance and  
94 evolutionary power of environments with low-selective pressure.

95

## 96 **RESULTS**

### 97 **Sub-MIC of ceftazidime select for high-level resistance**

98 Here, we wanted to study the evolvability of the carbapenemase OXA-48 under sub-  
99 MIC of the cephalosporin ceftazidime. OXA-48 does not hydrolyse ceftazidime  
100 efficiently (Poirel et al., 2011). However, we recently showed, that the exposure to  
101 increasing concentrations of ceftazidime can select for OXA-48 variants with elevated  
102 activity towards ceftazidime (Fröhlich et al., 2019). We used the previously constructed  
103 *E. coli* MG1655 (Table S1, MP13-06) (Fröhlich et al., 2019) carrying a globally  
104 disseminated IncL plasmid with *bla*<sub>OXA-48</sub> as the only antibiotic resistance gene. MP13-  
105 06 was evolved without selection pressure and at one quarter of the ceftazidime MIC  
106 (0.06 mg/L) resulting in the populations 1 to 3 (Pop1 to 3) and 4 to 6 (Pop4 to 6),  
107 respectively (Figure 1A).

108 To elucidate the effect of ceftazidime, we measured dose-response curves of  
109 the whole evolved populations and calculated the ceftazidime concentrations inhibiting  
110 50% of cell growth (IC<sub>50</sub>). In Pop1 to 3, evolution without selection pressure did not  
111 result in altered ceftazidime susceptibility (Figure 1B). In contrast, under ceftazidime  
112 selection (Pop4 to 6), susceptibility decreased on average 16-fold already after 50  
113 generations (Figure 1B). We observed that, during the course of experimental  
114 evolution, the susceptibilities of Pop4 to 6 shifted towards lower ceftazidime resistance  
115 (Figure 1B).

116 From the evolved populations, we measured the fraction of clones exhibiting a  
117 clinically significant MIC change (>2-fold) by non-selective and selective plating on

118 1 mg/L ceftazidime. No clones were identified during selection-free evolution above  
119 the detection limit ( $10^{-7}$  of the population). Under sub-MIC conditions, we found a  
120 significant fraction of the populations able to grow on ceftazidime containing plates  
121 (Figure 1C). While this fraction was stably maintained in Pop4, we found that Pop5 and  
122 Pop6 showed a significant reduction over time (Pearson correlation,  $P=0.54$ ,  $P=0.01$ ,  
123  $P=0.03$ ).

124 To determine the MIC distribution of clones with increased MIC, we selected  
125 approximately 50 colonies every 50<sup>th</sup> generation from the selective plates and tested  
126 their susceptibility to ceftazidime (Figure 1C). All pre-selected clones displayed a MIC  
127 increase ranging from 2- to 128-fold. For Pop 4 to 6, we found that on average 11%,  
128 28% and 34% of the tested colonies exhibited MIC values above the clinical resistance  
129 breakpoint of 4 mg/L, respectively (Breakpoint table v. 10.0). These results are  
130 consistent with recent reports demonstrating that low-level concentrations of antibiotics  
131 facilitate the selection of high-level resistance (Gullberg et al., 2011; Westhoff et al.,  
132 2017).

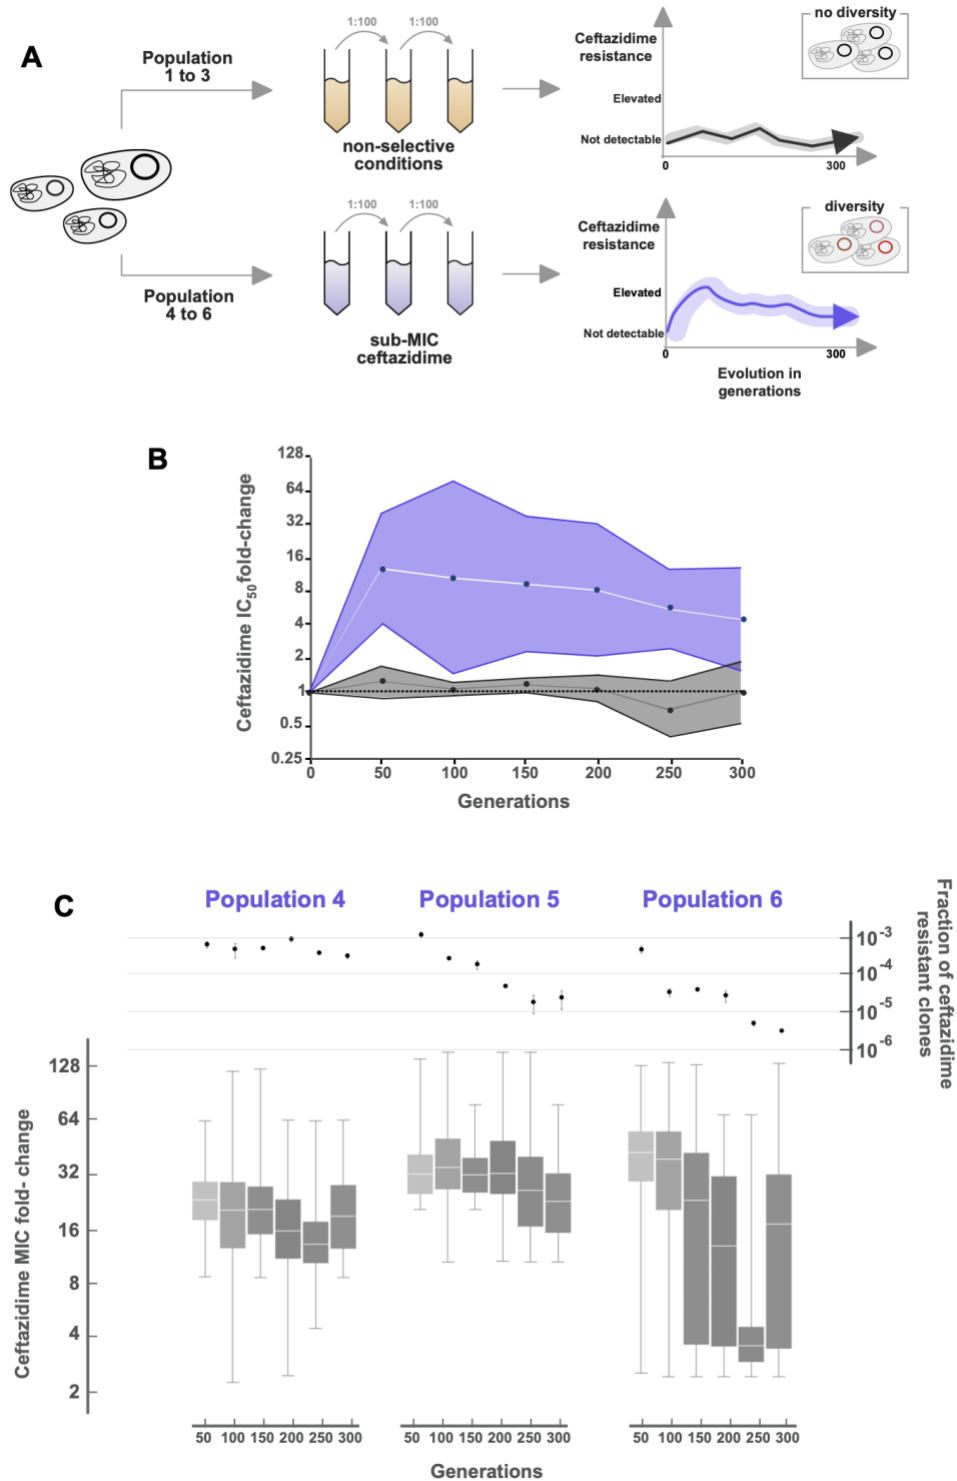

133

134 **Figure 1.** Population level effects of sub-MIC ceftazidime exposure. A. Experimental

135 design. B:  $IC_{50}$  fold-change for populations evolved without (grey) and under sub-MIC

136 ceftazidime conditions (violet), relative to wild-type OXA-48. Bands represent the

137 standard deviation around the geometric mean. C: Top section shows the fraction of

138 clones able to grow on ceftazidime 1 mg/L (>2-fold MIC). Bottom section displays MIC  
139 fold-change distributions of pre-selected clones. Boxplots represent quartiles and the  
140 median of the distributions.

141

#### 142 **Sub-MIC evolution selects for beneficial single point mutations in *bla*<sub>OXA-48</sub>**

143 To understand the effect of sub-MIC exposure on OXA-48, we sequenced the *bla*<sub>OXA-</sub>  
144 <sub>48</sub> gene of approximately 50 clones after 50 and 300 generations, which were pre-  
145 selected on agar plates containing 1 mg/L ceftazidime. In total, seven single variants  
146 of OXA-48 were identified: L67F, P68S, F72L, F156C, F156V, L158P and G160C. The  
147 relative frequency of these variants varied among populations and generations (Figure  
148 2A). Interestingly, double mutants with similar (F72I/G131S) or identical  
149 (N146S/L158P) amino acid changes have been already reported in environmental  
150 samples (Tacao et al., 2017). To elucidate the effect of these second mutations, we  
151 constructed the OXA-48 double mutants F72L/G131S (instead of F72I) and  
152 N146S/L158P and included them in the following characterization.

153 To isolate the effects of OXA-48 on antimicrobial susceptibility, we sub-cloned  
154 all allele variants into a high-copy number vector (pCR-Blunt II-TOPO) and expressed  
155 them in *E. coli* TOP10 (Table 1). As previously shown (Fröhlich et al., 2019), the  
156 expression of OXA-48 resulted in up to 32- and 64-fold increased MIC towards  
157 penicillins and carbapenems (except for doripenem), respectively. While wild-type  
158 OXA-48 expression did not increase the MIC against cephalosporins (<2-fold), we  
159 found that P68S, F72L, L158P and N146S/L158P resulted in 4- to 16-fold increased  
160 MIC against ceftazidime. Interestingly, the expression of all other alleles (L67F,  
161 F156C/V, G160C, F72L/G131S) did not increase the ceftazidime MIC significantly (i.e.,  
162 not more than 2-fold, compared to wild-type OXA-48). In addition, none of the alleles



163 showed a significant effect on cephalosporins other than ceftazidime (Table 1). In  
164 contrast, the susceptibility to carbapenems and penicillins was increased by 2- to  $\geq$ 64-  
165 fold for all the variants. The expression of F156C and G160C did not increase the MIC  
166 to any  $\beta$ -lactam. In clinical strains, OXA-48 is frequently located on IncL plasmids which  
167 are typically present in low copy numbers (Preston et al., 2014). To mimic this situation,  
168 we sub-cloned all OXA-48 alleles into a low copy number vector (pUN), expressed  
169 these in *E. coli* MG1655, and repeated the ceftazidime MIC measurements. Within this  
170 more realistic genetic architecture only F156V increased the ceftazidime MIC by more  
171 than 2-fold (Table S2).

172 Clinically insignificant or marginal changes in MIC have been reported to still  
173 confer high fitness benefits in the presence of low-level selection (Negri et al., 2000).  
174 To address this, we first increased the resolution of the susceptibility testing by  
175 measuring the dose-response curves, in the low copy number vector. Calculating their  
176 corresponding IC<sub>50</sub> values, we found that all variants conferred marginal but significant  
177 decreases in ceftazidime susceptibility (Figure 2B and Table S2, ANOVA, df=10,  
178 P<0.0001, followed by Dunnett post hoc test).

179 Secondly, we performed head-to-head competitions between isogenic *E. coli*  
180 MG1655 strains (only differing in  $\Delta malF$ ) to test the fitness effect of OXA-48 variants  
181 in the absence and presence of sub-MIC ceftazidime. To exclude an effect of the *malF*  
182 deletion on the bacterial fitness, we initially competed the strains both carrying the pUN  
183 vector encoding wild-type *bla*<sub>OXA-48</sub> (MP08-61 and MP14-24). No significant change in  
184 bacterial fitness was observed in either condition (Welch t-test, P=0.24 and P=0.48),  
185 out-ruling a detectable effect of the *malF* deletion. Therefore, we next expressed all  
186 OXA-48 variants in MP14-23 and subjected those to competitions against MP08-61.  
187 Without ceftazidime, no difference in fitness was observed between variants and wild-

188 type (Figure S1; ANOVA, not assuming equal variances,  $df=7$ ,  $P=0.33$ ). However, at  
189 sub-MIC ceftazidime, all allele variants showed strong significant growth benefits  
190 (Figure 2B; ANOVA, not assuming equal variances,  $df=7$ ,  $P=0.0003$ , followed by a  
191 Dunnett post hoc test with OXA-48 as control group).

192 Two mutational targets identified in our study (F72L and L158P) were recently  
193 isolated from the environment, in combination with a second amino acid substitution  
194 (Tacao et al., 2017). We aimed to elucidate the effect of G131S and N146S in  
195 combination with F72L and L158P, respectively. To do so, we competed the F72L and  
196 L158P against the double mutants F72L/G131S and N146S/L158P, respectively. No  
197 significant change in fitness was detectable in the absence of selection pressure  
198 (Figure S2; Welch t-test,  $P=0.24$  and  $0.62$  for F72L/G131S and N146S/L158P,  
199 respectively). At sub-MIC ceftazidime, our data suggest no positive selection for the  
200 double mutants (Figure S2; paired Welch t-test between conditions,  $P=0.038$  and  $0.59$   
201 for F72L/G131S and N146S/L158P). Thus, the role of these second mutations remains  
202 unclear.

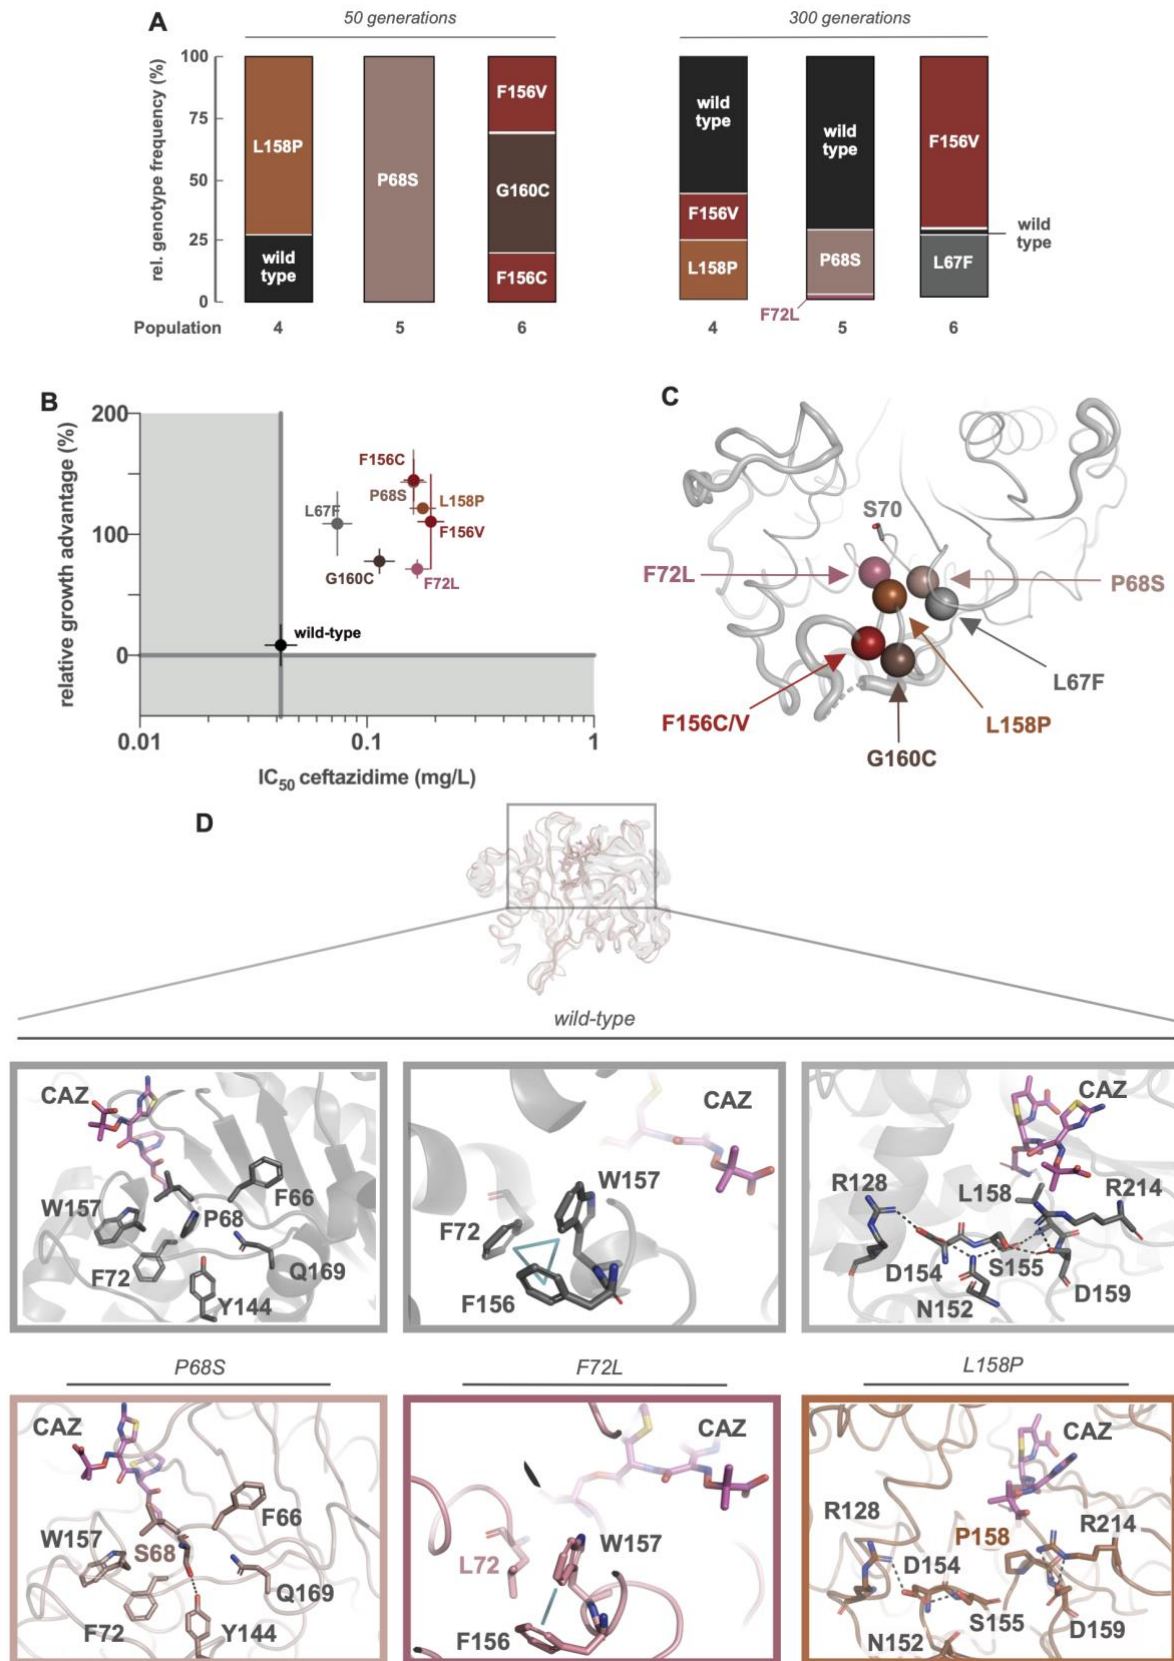

203

204

205

**Figure 2.** Phenotypic and structural investigation of OXA-48 allele variants. A. Relative genotype frequencies of *bla*<sub>OXA-48</sub> variants within Pop4 to 6. B. Relative growth

206 advantage of OXA-48 variants expressed at sub-MIC of ceftazidime *versus* their  
207 ceftazidime IC<sub>50</sub>. Despite marginal changes in their ceftazidime susceptibility (IC<sub>50</sub>  
208 increased by 2- to 4-fold), the expression of these alleles displays large fitness benefits  
209 at sub-MIC ceftazidime. Error bars represent the standard deviation. C. Ribbon  
210 structure of OXA-48 including the amino acid changes close to the active site.  
211 D. Representative structures from molecular dynamics simulations of wild-type, P68S,  
212 F72L and L158P performed with ceftazidime covalently bound to the active site S70.  
213 In short, S68 in P68S displays an H-bond with the tyrosine in the conserved Y<sup>144</sup>GN  
214 motif of OXA-48. F72L lacks the aromatic stacking interaction between F72 and  
215 F156/W157. L158P disrupts the H-bond network within the Ω-loop.

216

### 217 **Mutations within *bla*<sub>OXA-48</sub> alter enzymatic properties**

218 In this study, sub-MIC ceftazidime were shown to select for OXA-48 variants conferring  
219 high bacterial fitness advantages despite only cryptic resistance phenotypes  
220 suggesting that, in clinic set-ups, these genetic changes are likely to remain  
221 undetected. To further our understanding of how these cryptic changes influence the  
222 enzymatic properties of OXA-48, we expressed the enzymes without their leader  
223 sequence in *E. coli* BL21 AI (Table S1). After enzyme purification, protein masses were  
224 verified using electrospray ionization mass spectrometry (ESI-MS). The molecular  
225 weight of five out of seven variants corresponded to their calculated monoisotopic  
226 masses (Table 2). For F156C and G160C, we observed an increase in molecular  
227 weight by 76 Da, likely caused by β-mercaptoethanol used during the purification  
228 process to increase solubility.

229 We determined their catalytic efficiencies ( $k_{cat}/K_M$ ) towards a panel of β-lactams  
230 and found that they were in-line with the antimicrobial susceptibility data. Towards

231 ceftazidime,  $k_{cat}/K_M$  values were increased by 2- to 31-fold (Table 2) for all variants  
232 compared to wild-type OXA-48. Moreover, all variants exhibited strongly reduced  
233 activity (up to several magnitudes) against penicillins (ampicillin and piperacillin) as  
234 well as a towards carbapenems (meropenem and imipenem). To test for cross-activity  
235 against 4<sup>th</sup> generation cephalosporins, we determined the catalytic efficiencies against  
236 cefepime. Also here, we found that the OXA-48 variants tended to display  $k_{cat}/K_M$   
237 values several magnitudes lower than the wild-type OXA-48 (Table 2).

238 Functional mutations within serine  $\beta$ -lactamases have frequently been  
239 described to decrease the thermostability (Fröhlich et al., 2019; Mehta et al., 2015;  
240 Thomas et al., 2010). Indeed, compared to wild-type OXA-48, all single amino acid  
241 changes were deleterious with respect to thermostability, which decreased by 4.5 to  
242 7.6°C (Table 2). F72L/G131S exhibited the lowest melting temperature with a decrease  
243 of 10.7°C. Generally, we found the following order for the thermal stability OXA-48 >  
244 L67F > F156C = N146S/L158P > L158P = F156V > F72L > G160C = P68S >  
245 F72L/G131S.

246

#### 247 **P68S, F72L and L158P increase the loop flexibility within OXA-48**

248 We found that single amino acid changes in OXA-48 were responsible for increased  
249 catalytic activity against ceftazidime. To understand the underlying structural changes  
250 allowing these OXA-48 variants to hydrolyse ceftazidime more efficiently, we first  
251 mapped all amino acid changes onto the structure of OXA-48 showing that they  
252 clustered around the  $\alpha$ 3-helix (L67F, P68S and F72L) and the  $\Omega$ -loop (F156C, F156V,  
253 L158P and G160C) (Figure 2C). Second, MD simulations were performed on a sub-  
254 set of variants (P68S, F72L and L158P) with covalently bound ceftazidime in their  
255 active site. Our previous study showed that an amino acid change at position 68 (P68A)

256 decreases ceftazidime susceptibility in OXA-48 (Fröhlich et al., 2019). Additionally,  
257 positions 72 and 158 were selected due to amino acid changes recently identified in  
258 environmental samples (F72I and L158P). Changes in enzyme flexibility were  
259 analysed by calculating root mean square fluctuations (RMSF) for the backbone atoms  
260 in the  $\Omega$ - and  $\beta$ 5- $\beta$ 6 loops and compared to wild-type OXA-48 and the ceftazidimase  
261 OXA-163 (only  $\Omega$ -loop, due to the shortened  $\beta$ 5- $\beta$ 6 loop).

262 For the  $\Omega$ -loop, P68S displayed very similar RMSF values relative to OXA-48;  
263 however, F72L and L158P showed increased flexibility in this region displaying even  
264 higher RMSF values than OXA-163 (Figure S3). Notably, the L158P substitution  
265 increased fluctuations specifically for residues N152 to S155. V153 demonstrated the  
266 largest overall shift in RMSF values with an increase of 0.7 Å, when compared to OXA-  
267 48. For the  $\beta$ 5- $\beta$ 6 loop, all variants exhibited an increase in fluctuations especially for  
268 the residues T213 to E216 (Figure S3).

269 Possible changes in intramolecular interactions due to the amino acid  
270 changes P68S, F72L and L158P were also studied from MD simulations. For P68S,  
271 an H-bond was observed between the hydroxyl groups of S68 and Y144 (Figure 2D).  
272 However, no other apparent structural changes near the active site were directly  
273 observed, and therefore the effect of P68S on the dynamical nature remains subtle.

274 In wild-type OXA-48, W157 in the  $\Omega$ -loop stacks with both F72 and F156 (Figure  
275 2D). Consequently, the lack of this interaction in F72L likely increases the flexibility of  
276 W157, which is reflected by a 0.2 Å increase in calculated RMSF (Figure S3).  
277 Furthermore, the wild-type  $\Omega$ -loop displays an organised H-bond network, which  
278 extends to R128 and R214 on either side (Figure 2D). We found that L158P is likely  
279 affecting this network by disrupting the interactions to S155 and D159. (Figure 2D).  
280 Consequently, the salt bridge between R128 and D154 was found to be weakened as

281 its presence was reduced from 87% to 43% of the simulation time. The loss of the  
282 backbone H-bond between L158 and S155, in the proline variant (L158P), has a knock-  
283 on effect on the rest of the loop, making it more flexible and likely to better  
284 accommodate bulkier  $\beta$ -lactam substrates such as ceftazidime.

285         Aside from flexibility and changes in amino acid interactions, possible further  
286 effects on the overall enzyme dynamics were inspected by performing principal  
287 component (PC) analysis on the combined MD trajectories (using the C $\alpha$ -atom  
288 positions). The overall sampling of conformational space is highly similar for OXA-48  
289 and the three variants (as indicated by histograms of the obtained PCs for all four  
290 enzymes, see Figure S4). There are no specific large conformational changes or  
291 coordinated loop movements induced by the mutations (with the first five PCs needed  
292 to cover ~75% of the variance in the data, Figure S5). Some differences between  
293 variants and wild-type OXA-48 were observed particularly for PCs that primarily involve  
294 movement of loops, including those surrounding the active site, further indicating that  
295 the mutations introduce small changes in loop dynamics (Figures S4 and S6).

296

### 297 **Release of ceftazidime from OXA-48 involves the $\beta$ 5- $\beta$ 6-loop**

298 To investigate substrate binding, all OXA-48 variants were crystallised and soaked with  
299 ceftazidime. We were able to solve the crystal structure of L67F to 1.9 Å with four  
300 chains (A to D) in the asymmetric unit (space group P2<sub>1</sub>2<sub>1</sub>2<sub>1</sub>) which were arranged into  
301 two dimers (chains A/C and B/D). Chain C and D carried a hydrolysed ceftazidime  
302 molecule approximately 9 Å away from the active site S70. The R1-group of  
303 ceftazidime including the dihydrothiazine ring demonstrated clear electron density  
304 (2Fo-Fc), however, no electron density was observed for the R2-ring (Figure 3, top).

305 We first investigated the binding of ceftazidime to the L67F variant. Here, we  
306 found Q98, R100, D101, W105, V120, P121, Q124, L158, T213 and R214 to be  
307 involved in, what we believe reflects, the product release (Figure 3, top). D101, Q124,  
308 T213 and R214 were found to interact with ceftazidime *via* H-bonds. R214 was further  
309 involved in ionic interactions with the two carboxylic acid groups of ceftazidime (Figure  
310 S7).

311 Second, we investigated the active site architecture, including the first shell  
312 residues around S70. Chain A was therefore superimposed onto a wild-type structure  
313 of OXA-48 (PDB no. 3HBR) (Docquier et al., 2009). As expected, superimposition  
314 resulted in low root mean square deviations of 0.21 Å. We found that K73 was  
315 carboxylated and that all first shell residues nicely aligned with the wild-type structure  
316 (Figure 3, middle).

317 Third, we investigated the mutational site around L67F that is located “below”  
318 the active site (Figure 3, bottom). We found F66, P68, A69, W157, L158, R163, I215  
319 and W221 to be directly interacting with amino acid position 67. In the L67F variant,  
320 both with and without ceftazidime, L158 and I215 were shifted by 1 to 2 Å, respectively.  
321 In addition, we found W221 to be flipped by 180°. While in the wild-type structure, the  
322 W221 side chain forms a water mediated H-bond to the backbone nitrogen of M237,  
323 in L67F, W221 formed a H-bond to the main chain of F67 (Figure 3).



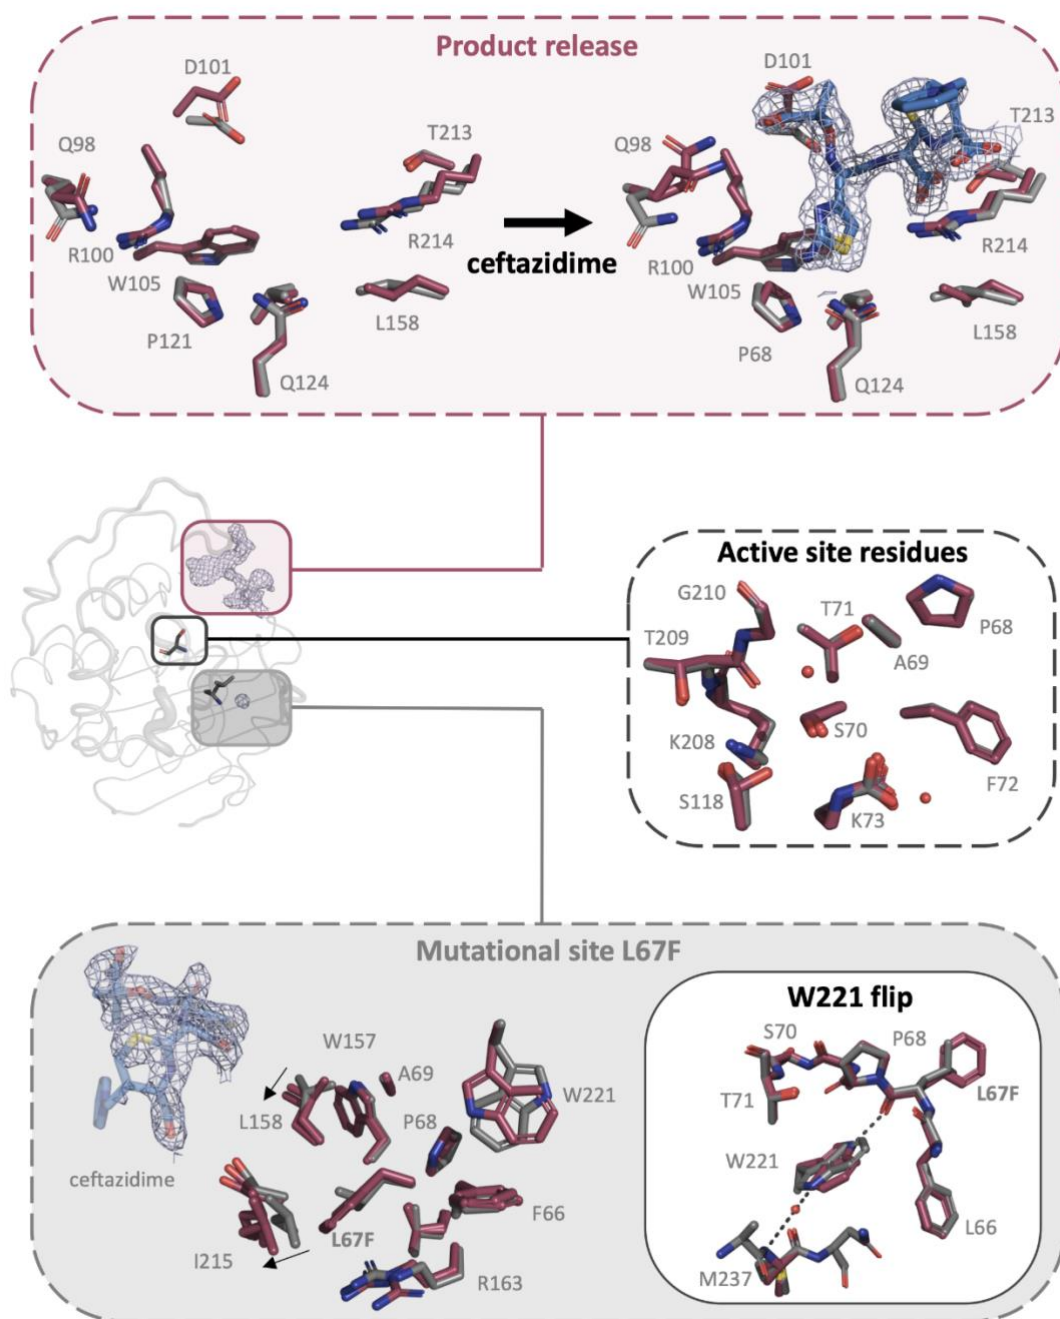

324

325 **Figure 3.** Product release (top panel), active site (middle) and the mutational site  
326 (bottom panel) of L67F (red) compared to the wild-type structure of OXA-48 shown in  
327 grey (PDB no. 3HBR) (Docquier et al., 2009). The crystal structure of L67F was solved  
328 to 1.9 Å and displayed hydrolysed ceftazidime ~ 9 Å away from the active site S70.  
329 Top panel: Binding pocket of L67F without (left, chain C) and with ceftazidime (right,  
330 chain A) compared to wild-type OXA-48. For ceftazidime, no 2Fo-Fc electron density

331 was detected for the R2 group. Middle panel: Superimposition of the first shell residues  
332 of L67F (chain A) around the active site S70, compared the wild-type structure. Bottom  
333 panel: Investigation of the mutational site, shown as first shell residues around L67F  
334 (both chain A and C), compared to wild-type OXA-48. Displacement of L158 (1 Å) and  
335 I215 (2 Å) in the L67F structure are indicated with arrows. W221 was flipped by 180°  
336 in the L67F structure.  
337

## 338 **DISCUSSION**

339 Here, we asked if sub-MIC of the clinically relevant  $\beta$ -lactam ceftazidime could affect  
340 the evolution of the contemporary, globally circulating carbapenemase OXA-48. To  
341 test this, we evolved an OXA-48 producing *E. coli* strain in the presence of one quarter  
342 of its ceftazidime MIC. The identification of seven single variants of OXA-48, conferring  
343 only marginal changes in susceptibility (Figure 2B, Table S2), demonstrates that the  
344 exposure to sub-MIC of ceftazidime drives the emergence of cryptic *bla*<sub>OXA-48</sub> genetic  
345 diversity. Thus, our data provide further support for the proposed “compartment  
346 hypothesis” (Baquero & Negri, 1997; Baquero et al., 1997, 1998a, 1998b), where low-  
347 grade selection promotes cryptic genetic variation that could act as stepping-stones  
348 towards full clinical antibiotic resistance (Baier et al., 2019; Zheng et al., 2019).  
349 Notably, even though all seven single OXA-48 variants largely displayed, from a clinical  
350 microbiology perspective, neglectable changes in ceftazidime susceptibility,  
351 competition experiments revealed strong beneficial fitness effects (Figure 2B). Taken  
352 together with earlier work, using reconstructed TEM-1 variants from clinical  
353 samples (Negri et al., 2000), our data underscore the significance of divergent  
354 evolution and selection of genetic variation imposed by sub-MIC of  $\beta$ -lactams.

355 To further our understanding of how the detected single amino changes affect  
356 the structure-activity relationship of OXA-48, we first measured enzyme kinetics (Table  
357 2). The catalytic efficiency mirrored the observed changes in susceptibility towards  $\beta$ -  
358 lactams at the cellular level and confirmed our previous findings that mutational  
359 changes increasing ceftazidime activity comes with a functional trade-off against  
360 penicillins and carbapenems (Fröhlich et al., 2019). Structurally all amino acid changes  
361 clustered either around the active site S70 (L67F, P68S, F72L) or within the  $\Omega$ -loop  
362 (F156C, F156V, L158P, G160C; Figure 2C).

363 In wild-type OXA-48, the  $\Omega$ -loop interacts with the  $\beta$ 5- $\beta$ 6 loop *via* a salt bridge  
364 mediated by D159-R214 maintaining a closed conformation of the active site (Docquier  
365 et al., 2009). MD simulations performed on a sub-set of variants revealed that F72L  
366 and L158P weaken the interaction between these loops resulting in increased  
367 structural flexibility (Figure S3). We postulate that these changes aid the hydrolysis of  
368 bulkier substrates like ceftazidime but result in decreased activity towards penicillins  
369 and carbapenems. Indeed, mutations affecting the salt bridge are associated with  
370 reduced carbapenemase activity presumably due to increased loop flexibility (Oueslati  
371 et al., 2020).

372 In clinical OXA-48-like variants (e.g. OXA-163, OXA-247 and OXA-405) with  
373 increased ceftazidime activity, larger structural variations (deletions in combination  
374 with single point mutations) within and around the  $\beta$ 5- $\beta$ 6 loop have been reported  
375 (Dortet et al., 2015; Gomez et al., 2013; Poirel et al., 2011). However, also single amino  
376 acid changes structurally close to the  $\Omega$ - and  $\beta$ 5- $\beta$ 6 loops have been shown to slightly  
377 elevate the catalytic efficiency towards ceftazidime (E125Y in OXA-245 and V120L in  
378 OXA-519) (Dabos et al., 2018; Lund et al., 2017). The significance of the  $\Omega$ - and  $\beta$ 5-  
379  $\beta$ 6 loops for the substrate profile is not limited to OXA-48 (Dabos et al., 2020; De Luca  
380 et al., 2011). These loops have been shown to impact substrate profiles for other  
381 clinically relevant  $\beta$ -lactamases including TEM and KPC (Levitt et al., 2012; Stojanoski  
382 et al., 2015; Venditti et al., 2019). In addition, comparable modes of action have been  
383 hypothesised for the OXA-10-like variants OXA-145 and OXA-147 exhibiting L158 $\Delta$   
384 and W157L, respectively (according to OXA-48 numbering) (Baurin et al., 2009;  
385 Fournier et al., 2010; Meziane-Cherif et al., 2016).

386 We were able to solve the structure of the OXA-48 variant L67F revealing a  
387 binding site for ceftazidime, approximately 9 Å away from the active site residue S70,

388 involving interaction with the above described  $\beta$ 5- $\beta$ 6 loop (Figure 3) and R214 in  
389 particular. Since ceftazidime was hydrolysed, we hypothesise that this may reflect the  
390 product release process (Figure S7).

391 Taken together, combining experimental evolution and structure-activity  
392 relationships allowed us to identify and characterize single step mutations with cryptic  
393 resistance that yet demonstrated significant fitness effects and structural changes. Our  
394 data show that to understand the evolutionary potential of standing genetic diversity,  
395 susceptibilities characterised solely by traditional MIC measurements provide too low  
396 resolution.

397 We acknowledge that our study is not without limitations as that, despite strong  
398 fitness effects, none of the variants went to fixation in any of the populations (Figure 1).  
399 We argue that there can be at least two reason for this. First, we have focused solely  
400 on OXA-48 mutations and it is clear from our data that the evolution at sub-MIC also  
401 selected for other potential resistance mechanisms. These mechanisms could lead to  
402 potential wide-spread epistatic interactions that would slow down any fixation  
403 process (de Visser & Rozen, 2006; Gullberg et al., 2011; Shields, Chen, et al., 2017;  
404 Shields, Nguyen, et al., 2017; Westhoff et al., 2017). Second, it has been shown that  
405  $\beta$ -lactamase producers can detoxify their environment allowing co-existence of  
406 genotypes with different susceptibilities resulting in clone-frequency equilibria (Yurtsev  
407 et al., 2013).

408 Our work sheds light on the evolution of  $\beta$ -lactamases and their selection  
409 dynamics towards altered substrate profiles. This is supported by recent studies  
410 reporting environmental contamination of cephalosporins at concentrations similar to  
411 those applied here (Ribeiro et al., 2018; Watkinson et al., 2009). Moreover, OXA-48  
412 variants, with the same or similar amino acid changes as identified and characterized

413 here, have been reported in environmental samples (Naas et al., 2017; Tacao et al.,  
414 2015). We speculate that the identified mutations are only first step mutations towards  
415 full clinical ceftazidime resistance mediated by OXA-48. However, more studies are  
416 needed to fully understand the complete fitness landscape of OXA-48 and other  
417 carbapenemases.

418

## 419 **METHODS**

### 420 **Media, chemicals and strains**

421 Mueller Hinton (MH) agar and broth were purchased from Thermo Fisher Scientific  
422 (East Grinstead, UK). Luria-Bertani (LB) broth, LB agar, yeast extract, agar, terrific  
423 broth, ampicillin, amoxicillin, cefepime, ceftazidime, chloramphenicol, imipenem,  
424 meropenem, piperacillin, 2,3,5 tri-phenyl tetrazolium, sodium chloride and maltose  
425 were obtained from Sigma-Aldrich (St. Louis, MO, USA). Tryptone was obtained from  
426 Oxoid (Hampshire, UK) All strains used and constructed within this study are listed in  
427 Table S1.

### 428 **Sub-MIC evolution**

429 MP13-06, previously constructed and tested (Fröhlich et al., 2019), was evolved by  
430 serial passaging without selection pressure and at 0.25xMIC (0.06 mg/L) of ceftazidime  
431 for 300 generations. In short, bacterial suspensions were grown at 37°C, 700 rpm on  
432 a plate shaker (Edmund Bühler, Bodelshausen, Germany) in 1 mL MH broth to full  
433 density and passaged every 12 h with a bottleneck of 1:100. The evolution was  
434 performed in triplicates.

### 435 **Dose-response curves and susceptibility testing**

436 Dose-response curves were obtained initially and after every 50 generations for the  
437 whole evolved populations. Cultures were grown to full density and diluted in 0.9%

438 saline to  $10^6$  CFU/mL. 384 well plates (VWR, Radnor, PA, USA) were inoculated with  
439  $10^5$  CFU and increasing concentrations of ceftazidime ranging from 0 to 32 mg/L.  
440 Plates were statically incubated for 20 h at 37°C. The optical density at 600 nm (OD<sub>600</sub>)  
441 was measured with a microtiter plate reader (Biotek Instruments, Winooski, VT, USA)  
442 and dose-response curves including IC<sub>50</sub> values were calculated using GraphPad  
443 Prism 9.0 (GraphPad Software, San Diego, CA, USA). In this set-up, the ceftazidime  
444 MIC was determined by measuring the OD<sub>600</sub> as the first well with an optical density,  
445 comparable to the negative control.

446 For MIC measurements against other  $\beta$ -lactams than ceftazidime, in-house designed  
447 and premade Sensititre microtiter plates (TREK Diagnostic Systems/Thermo Fisher  
448 Scientific, East Grinstead, UK) were loaded with  $10^5$  CFU. The plates were incubated  
449 statically for 20 h at 37°C. All susceptibility tests were performed in at least two  
450 biological replicates.

#### 451 **Determination of clones with altered ceftazidime susceptibility**

452 To determine clones exhibiting decreased ceftazidime susceptibility, we plated  $10^7$   
453 cells from every 50<sup>th</sup> generation on MH agar without and with 1 mg/L ceftazidime. The  
454 plates were incubated for 24 h at 37°C. Clone frequencies were determined as the  
455 ratio between colonies found on selective *versus* non-selective plates. About 50 pre-  
456 selected colonies were subjected to susceptibility testing, as described above. For  
457 creating the boxplots, a probability function was calculated based on MIC per replicate.  
458 Since the MIC were determined in 2-fold steps, we generated smoother boxplots by  
459 creating 1000 random measurements per generation. We have done so by drawing a  
460 random number between the  $\log_2$  (MIC values) and  $\log_2$  (MIC values) +1 a 1000 x  
461  $f_{mic}$ , where  $f_{mic}$  is the fraction of the population. All calculations were done in  
462 Mathematica 11.0 (Wolfram Research, Champaign, IL, USA).

## 463 **Strain construction**

464 For functional resistance profiles, wild-type *bla*<sub>OXA-48</sub> and allele variants were sub-  
465 cloned into the high copy number vector pCR-blunt II-TOPO vector (Invitrogen,  
466 Carlsbad, CA, USA) and expressed in *E. coli* TOP10 (Invitrogen). For wild-type TOPO-  
467 *bla*<sub>OXA-48</sub>, the construction has been described previously (Fröhlich et al., 2019). Point  
468 mutations were inserted by using the Quick-change II kit for site directed mutagenesis  
469 (Agilent Biosciences, Santa Clara, CA, USA), TOPO-*bla*<sub>OXA-48</sub> as a template and the  
470 respective primers (Table S3). The double mutants TOPO-*bla*<sub>OXA-48</sub>-F72L/G131S and  
471 TOPO-*bla*<sub>OXA-48</sub>-N146S/L158P were created by inverse PCR using Phusion  
472 polymerase (New England Biolabs, Ipswich, MA, USA) and TOPO-*bla*<sub>OXA-48</sub>-F72L or  
473 TOPO-*bla*<sub>OXA-48</sub>-L158P as a template, respectively. PCR products were 5'-  
474 phosphorylated with polynucleotide kinase (Thermo Fisher Scientific, Waltham, MA,  
475 USA), and circularised using T4 DNA ligase (Thermo Fisher Scientific). Transformants  
476 were selected on LB agar plates containing 50 or 100 mg/L ampicillin. *Bla*<sub>OXA-48</sub> was  
477 Sanger sequenced (BigDye 3.1 technology, Applied Biosystems, Foster City, CA,  
478 USA) using M13 primers (Thermo Fisher Scientific) (Table S3).

479 For expression in a low copy number vector (pUN), we PCR-amplified a segment  
480 containing the p15A origin of replication and the *cat* chloramphenicol resistance gene  
481 of the pACYC184 vector using the primers *cat*-r and p15A46 (Table S3). To obtain the  
482 *bla*<sub>OXA-48</sub> inserts, the pCR-blunt II-TOPO constructs (see above) were used as  
483 templates. We amplified the *bla*<sub>OXA-48</sub> genes by using the primers OXA-48-pro-f,  
484 containing the constitutive artificial CP6 promoter (Jensen & Hammer, 1998), and  
485 preOXA-48B (Table S3) (Samuelsen et al., 2013). These PCR products were 5'-  
486 phosphorylated with polynucleotide kinase (Thermo Fisher Scientific) and then blunt  
487 ligated with the amplified vector backbone. The resulting in pUN-*bla*<sub>OXA-48</sub> vector and



488 the corresponding variants were transformed into *E. coli* DH5 $\alpha$  and plated on LB agar  
489 containing chloramphenicol (25 mg/L). Genotypes of selected clones were confirmed  
490 by Sanger sequencing (BigDye 3.1 technology, Applied Biosystems) using preOXA-  
491 48A/B primers (Table S3) (Samuelsen et al., 2013).

492 To measure bacterial fitness, *E. coli* MG1655  $\Delta malF$  (MP14-23) was constructed as a  
493 competitor strain by transducing the kanamycin resistance marker from the Keio strain  
494 JW3993 with P1-vir into *E. coli* MG1655 as published (Baba & Mori, 2008; Thomason  
495 et al., 2007). The marker was then removed with the helper vector pCP20 (Datsenko  
496 & Wanner, 2000). The competitor strain MP14-23 was then transformed with pUN-  
497 *bla*<sub>OXA-48</sub> and the corresponding variants (Table S1). Transformants were selected on  
498 LB plates containing 25 mg/L chloramphenicol.

499 For protein expression and purification, *bla*<sub>OXA-48</sub> in the pDEST17 expression  
500 vector (Thermo Fisher Scientific) was mutagenized using QuickChange II site-directed  
501 mutagenesis kit as described above. *E. coli* DH5 $\alpha$  was transformed with the DNA  
502 constructs and clones were selected on LB agar containing 100mg/L ampicillin. The  
503 vectors were isolated using a plasmid maxi kit (Qiagen, Hilden, Germany) and  
504 transformed into *E. coli* BL21 AI (Thermo Fisher Scientific). Point mutations were  
505 verified by Sanger sequencing using T7 primers (Thermo Fisher Scientific) (Table S3).

#### 506 **Bacterial fitness: head-to-head competition**

507 Strains were grown overnight in LB supplemented with chloramphenicol (25 mg/L) at  
508 37°C and 700 rpm on a plate shaker (Edmund Bühler). For each competition, we co-  
509 inoculated  $\sim 1 \times 10^7$  CFU/mL of each competitor in 1 mL LB broth, supplemented with  
510 either chloramphenicol (25 mg/L) and ceftazidime (0.06 mg/L), or with chloramphenicol  
511 only. 96-deep-well plates (VWR) were incubated at 37°C and 700 rpm for 8 h. Each

512 competition was performed in three biological replicates. Initial and final CFU/mL for  
513 both competitors were determined by differential plating on tetrazolium maltose agar  
514 (10 g/L tryptone, 5 g/L sodium chloride, 1 g/L yeast extract, 15 g/L agar, 10 g/L maltose,  
515 supplemented with 1 mL 5% 2,3,5 tri-phenyl tetrazolium chloride). Relative fitness ( $w$ )  
516 was determined according to equation 1, where  $mal^+$  and  $mal^-$  are respectively the  $mal^+$   
517 and  $\Delta malF$  strain backgrounds carrying the different pUN vectors (Table S1).

518 Equation 1

$$w = \frac{\log_2 \frac{mal^-_{final}}{mal^-_{initial}}}{\log_2 \frac{mal^+_{final}}{mal^+_{initial}}}$$

519 The  $mal^+$  pUN- $bla_{OXA-48}$  strain (MP08-61) was competed against  $\Delta malF$  strains carrying  
520 each of the pUN vectors encoding wild-type  $bla_{OXA-48}$  or single variants (Table S1).  
521 Additionally, the  $mal^+$  pUN- $bla_{OXA-48}$ -F72L (MP08-67) and  $mal^+$  pUN- $bla_{OXA-48}$ -L158P  
522 (MP08-63) strains were used as competitors respectively against strains  $\Delta malF$  pUN-  
523  $bla_{OXA-48}$ -F72L/G131S (MP14-32) and  $\Delta malF$  pUN- $bla_{OXA-48}$ -N146S/L158P (MP14-33),  
524 respectively. Data analysis and graphical illustrations were performed in R version  
525 4.0.2 (RCoreTeam, 2018).

## 526 Recombinant enzyme expression and purification

527 Overexpression of OXA-48 and the corresponding variants was done in terrific broth  
528 supplemented with 100 mg/L ampicillin. *E. coli* BL21 AI carrying pDEST-17- $bla_{OXA-48}$   
529 and OXA-48 variants (Table S1) were grown at 37°C and 220 rpm to an optical density  
530 of 0.4 to 0.5. Protein expression was induced with 0.1% L-arabinose (Sigma-Aldrich).  
531 Expression took place for 16 h at 15°C and 220 rpm. Harvested cells were sonicated,  
532 and recombinant proteins were purified as described previously (Fröhlich et al., 2019;  
533 Lund et al., 2016). F156C and G160C were found to be insoluble. To increase their  
534 solubility, 5 mM  $\beta$ -mercaptoethanol was used during the sonication process.

### 535 **Molecular mass verification**

536 ESI-MS was performed on the purified enzymes as described previously (Fröhlich et  
537 al., 2020). In short, a buffer exchange to 0.1% formic acid (Merck Millipore, Burlington,  
538 MA, USA) was performed using centrifugal molecular cut-off filters (Merck Millipore;  
539 10,000 Da). The protein masses were determined using an Orbitrap Fusion Lumos  
540 (Thermo Fisher Scientific). Injection was performed using an EASY-nano LC (Thermo  
541 Fisher Scientific) with a 15 cm C18 EASY-spray column. Mass calculations were done  
542 using the BioPharma Finder 3.0 protein deconvolution software (Thermo Fisher  
543 Scientific, MA, USA).

### 544 **Steady-state enzyme kinetics**

545 Catalytic efficiencies ( $k_{cat}/K_M$ ) for the recombinantly expressed enzymes were  
546 determined under steady-state conditions for ampicillin ( $\Delta\xi = -820 \text{ M}^{-1} \text{ cm}^{-1}$ , 232 nm),  
547 piperacillin ( $\Delta\xi = -820 \text{ M}^{-1} \text{ cm}^{-1}$ , 235 nm), ceftazidime ( $\Delta\xi = -9,000 \text{ M}^{-1} \text{ cm}^{-1}$ , 260 nm),  
548 cefepime ( $\Delta\xi = -10,000 \text{ M}^{-1} \text{ cm}^{-1}$ , 260 nm), imipenem ( $\Delta\xi = -9,000 \text{ M}^{-1} \text{ cm}^{-1}$ , 300 nm),  
549 and meropenem ( $\Delta\xi = -6,500 \text{ M}^{-1} \text{ cm}^{-1}$ , 300 nm) by measuring the initial enzymatic  
550 reaction rate. Enzyme concentrations are summarised in Table S4. All determinations  
551 were performed at least in duplicates at a final assay volume of 100  $\mu\text{L}$ . UV-transparent  
552 96 well plates (Corning, Kennebunk, ME, USA) were used. All test results were  
553 obtained at 25°C and in 0.1 M phosphate buffer (pH 7.0) supplemented with 50 mM  
554  $\text{NaHCO}_3$  (Sigma Aldrich). Calculations were performed by using GraphPad Prism 9.0  
555 (GraphPad Software).

### 556 **Thermostability**

557 We determined the fluorescence-based protein thermostability for OXA-48, as  
558 described previously (Fröhlich et al., 2019). In short, the proteins were diluted in 50 mM  
559 HEPES (VWR), pH 7.5 supplemented with 50 mM potassium sulphate (Honeywell,

560 NC, USA) to a final concentration of 0.2 mg/mL protein and 5x SYPRO orange (Sigma-  
561 Aldrich). A temperature gradient of 25 to 70°C (heating rate 1°C per min) was applied  
562 using a MJ minicycler (Bio-Rad, Hercules, CA, USA). All experiments were performed  
563 triplicates.

#### 564 **Molecular dynamics simulations**

565 System set-up was done as described previously (further details in the SI) (Hirvonen  
566 et al., 2020). All systems were initially briefly minimized (1000 steps of steepest  
567 descent followed by 1000 steps of conjugate gradient), heated from 50 K to 300 K in  
568 20 ps, and then simulated for 120 ns in the NPT ensemble (saving a frame every 20  
569 ps). Langevin dynamics were used with a collision frequency of 0.2 and a 2 fs timestep,  
570 all bonds involving hydrogens were constrained using the SHAKE algorithm. Periodic  
571 boundary conditions in explicit solvent were applied in all simulations. Five  
572 independent simulations were run per enzyme variant (for a total of 600 ns per variant),  
573 and all calculations were done with the Amber18 program package (pmemd.cuda)  
574 (Rubenstein et al., 2018) using the ff14SB force field (Maier et al., 2015) for the protein  
575 and TIP3P for water (Grand et al., 2013; Salomon-Ferrer et al., 2013). All analyses  
576 were done using cpptraj from AmberTools (Roe & Cheatham, 2013). Further  
577 computational details can be found in the supplementary material.

#### 578 **Crystallization and structure determination**

579 Crystals were grown in a 1 µL hanging drop containing 5 mg/mL enzyme and mixed  
580 1:1 with reservoir solution containing 0.1 M Tris, pH 9.0 (Sigma-Aldrich) and 28-30%  
581 PEG mono ethylene ether 500 (Sigma-Aldrich) at 4°C. Crystals were harvested,  
582 cryoprotected by adding 15% ethylene glycol (Sigma-Aldrich) to the reservoir solution  
583 and then frozen in liquid nitrogen.

584 Diffraction data were collected on BL14.1 BESSY II, Berlin, Germany, at 100 K,  
585 wavelength 0.9184 Å, and the diffraction images were indexed and integrated using  
586 XDS (Kabsch, 2010). AIMLESS was used for scaling (Evans & Murshudov, 2013).  
587 When scaling the final dataset (Table S5), we aimed for high overall completeness,  
588 and  $CC_{1/2} > 0.5$  and a mean intensity  $\langle I \rangle$  above 1.0 in the outer resolution shell. The  
589 structure was solved by molecular replacement with chain A of PDB no. 5QB4 (Akhter  
590 et al., 2018) and the program Phenix 1.12 (Adams et al., 2010). Parts of the model was  
591 rebuilt using Coot (Emsley et al., 2010). Figures were prepared using PyMOL version  
592 1.8 (Schrödinger, New York City, NY, USA). Ligand and protein interactions were  
593 calculated using Protein Contact Atlas (Kayikci et al., 2018).

#### 594 **Data availability/accession numbers**

595 Atom coordinates and structure factors for the OXA-48 variant L67F are deposited in  
596 the protein data bank (PDB no. 7ASS). Data will be made available as source files.

#### 597 **ACKNOWLEDGMENTS**

598 We are very grateful to Linus Sandegren, Uppsala University, Sweden, and Francisco  
599 Dionísio, University of Lisbon, Portugal, for providing strains. We thank Karina Xavier  
600 (The Instituto Gulbenkian Ciência, Portugal) for providing the P1 phage. Provision of  
601 beam time at BL14.1 at Bessy II, Berlin, Germany is highly valued. Hanna-Kirsti S.  
602 Leiros was supported by Norwegian Research Council (273332/2018). Pål Jarle  
603 Johnsen was supported by Northern Norway Regional Health Authority, UiT The Arctic  
604 University of Norway (Project SFP1292-16), and JPI-EC-AMR (Project 271176/H10).  
605 Viivi H.A. Hirvonen was supported by the UK Medical Research Council  
606 (MR/N0137941/1). Marc W. van der Kamp is a BBSRC David Phillips Fellow and  
607 thanks the Biotechnology and Biological Sciences Research Council for funding  
608 (BB/M026280/1). Simulations were performed using the computational facilities of the

609 Advanced Computing Research Centre, University of Bristol. We would also like to  
610 extend our thanks to François Pierre Alexandre Cléon, Vidar Sørum, Antal Martinecz  
611 and Alexander Wessel for their help.

## 612 **COMPETING INTERESTS**

613 None to declare.

## 614 **SUPPLEMENTARY MATERIAL**

615 **Supplementary information:** molecular dynamics simulations

### 616 **Supplementary tables**

617 **Table S1.** Strains used and constructed in this study

618 **Table S2.** Ceftazidime susceptibility (MIC and IC<sub>50</sub>) measurements (mg/L) of OXA-48  
619 and variants expressed from the low copy number vector pUN in *E. coli* MG1655Δ*malF*  
620 (MP08-23). Susceptibility was determined based on a minimum of 2 biological  
621 replicates. The 95% confidence interval [CI95%] were calculated for the IC<sub>50</sub> values.

622 **Table S3.** Primers used in the study

623 **Table S4.** Enzyme concentrations (nM) for steady-state kinetics

624 **Table S5.** X-ray data collection and refinement statistics for the OXA-48 variant L67F  
625 in complex with hydrolysed ceftazidime. Values in parenthesis are for the highest  
626 resolution shell.

### 627 **Supplementary figures**

628 **Figure S1.** Head-to-head competitions, between *E. coli* MG1655 *mal*<sup>+</sup> and MG1655  
629 Δ*malF* expressing wild-type and allele variants of OXA-48, conducted without (grey)  
630 and at sub-MIC (red) of ceftazidime. While expression without selection pressure was  
631 neutral for all alleles, at sub-MIC, all allele variants showed fitness benefits over the  
632 wild-type allele. The dots represent biological replicates and significantly different

633 averages, compared to OXA-48 in the presence of ceftazidime (0.06 mg/L), are  
634 marked with \* ( $P < 0.05$ ), \*\* ( $P < 0.01$ ) and \*\*\* ( $P < 0.001$ ).

635 **Figure S2.** Head-to-head competitions between MG1655 expressing F72L versus  
636 F72L/G131S and L158P versus N146S/L158P. G131S and N146S did not improve  
637 bacterial fitness at sub-MIC ceftazidime. The dots represent biological replicates.  
638 Significant differences are indicated as \* representing  $P < 0.05$ .

639 **Figure S3.** Root mean square fluctuations (RMSFs) for the clinical variants OXA-48  
640 and OXA-163 as well as for a sub-set of OXA-48 variants: P68S, F72L and L158P.  
641 RMSFs for residues in the  $\Omega$ -loop (A) and for the  $\beta 5$ - $\beta 6$  loop (B).

642 **Figure S4.** Normalized histograms of PC1-PC5 (A to E) for OXA-48 and the variants  
643 P68S, F72L and L158P. The histograms are calculated using 200 bins per enzyme.

644 **Figure S5.** Cumulative variance covered by the ten principal components.

645 **Figure S6.** Dynamic differences between wild-type OXA-48, P68S, F72L and L158P  
646 captured by PC1 (A) and PC5 (B). Arrows indicating  $C\alpha$ -movement in PC1 (A) and  
647 PC5 (B), arrow direction and size indicating direction of the eigenvector and magnitude  
648 of the corresponding eigenvalue (arrows only shown for atoms with eigen values  $> 2.5$   
649 Å).

650 **Figure S7:** Schematic representation of hydrolysed ceftazidime in front of the active  
651 site of the OXA-48 variant L67F (based on PDB no. 7ASS). The ceftazidime side  
652 chains R1 and R2 are labelled and marked. For R2, no electron density and therefore  
653 no interactions were detected. Hydrogen bonds from ceftazidime to D101, Q124, T213  
654 and R214 are represented with dashed lines. The salt bridges to R214 are indicated  
655 with arrows.

656

657 **REFERENCES**

- 658 Adams, P. D., Afonine, P. V., Bunkoczi, G., Chen, V. B., Davis, I. W., Echols, N.,  
659 Headd, J. J., Hung, L. W., Kapral, G. J., Grosse-Kunstleve, R. W., McCoy, A.  
660 J., Moriarty, N. W., Oeffner, R., Read, R. J., Richardson, D. C., Richardson, J.  
661 S., Terwilliger, T. C., & Zwart, P. H. (2010). PHENIX: a comprehensive Python-  
662 based system for macromolecular structure solution. *Acta Crystallogr D Biol*  
663 *Crystallogr*, 66(Pt 2), 213-221. <https://doi.org/10.1107/S0907444909052925>
- 664 Akhter, S., Lund, B. A., Ismael, A., Langer, M., Isaksson, J., Christopeit, T., Leiros, H.  
665 S., & Bayer, A. (2018). A focused fragment library targeting the antibiotic  
666 resistance enzyme - Oxacillinase-48: Synthesis, structural evaluation and  
667 inhibitor design. *Eur J Med Chem*, 145, 634-648.  
668 <https://doi.org/10.1016/j.ejmech.2017.12.085>
- 669 Baba, T., & Mori, H. (2008). The construction of systematic in-frame, single-gene  
670 knockout mutant collection in *Escherichia coli* K-12. *Methods Mol Biol*, 416, 171-  
671 181. [https://doi.org/10.1007/978-1-59745-321-9\\_11](https://doi.org/10.1007/978-1-59745-321-9_11)
- 672 Bagge, N., Hentzer, M., Andersen, J. B., Ciofu, O., Givskov, M., & Hoiby, N. (2004).  
673 Dynamics and spatial distribution of  $\beta$ -lactamase expression in *Pseudomonas*  
674 *aeruginosa* biofilms. *Antimicrob Agents Chemother*, 48(4), 1168-1174.  
675 <https://doi.org/10.1128/aac.48.4.1168-1174.2004>
- 676 Baier, F., Hong, N., Yang, G., Pabis, A., Miton, C. M., Barrozo, A., Carr, P. D.,  
677 Kamerlin, S. C., Jackson, C. J., & Tokuriki, N. (2019). Cryptic genetic variation  
678 shapes the adaptive evolutionary potential of enzymes. *Elife*, 8.  
679 <https://doi.org/10.7554/eLife.40789>
- 680 Baquero, F. (2001). Low-level antibacterial resistance: a gateway to clinical resistance.  
681 *Drug Resist Updat*, 4(2), 93-105. <https://doi.org/10.1054/drup.2001.0196>



- 682 Baquero, F., & Negri, M. C. (1997). Selective compartments for resistant  
683 microorganisms in antibiotic gradients. *Bioessays*, 19(8), 731-736.  
684 <https://doi.org/10.1002/bies.950190814>
- 685 Baquero, F., Negri, M. C., Morosini, M. I., & Blazquez, J. (1997). The antibiotic selective  
686 process: concentration-specific amplification of low-level resistant populations.  
687 *Ciba Found Symp*, 207, 93-105; discussion 105-111.  
688 <https://doi.org/10.1002/9780470515358.ch7>
- 689 Baquero, F., Negri, M. C., Morosini, M. I., & Blazquez, J. (1998a). Antibiotic-selective  
690 environments. *Clin Infect Dis*, 27 Suppl 1, S5-11.  
691 <https://doi.org/10.1086/514916>
- 692 Baquero, F., Negri, M. C., Morosini, M. I., & Blazquez, J. (1998b). Selection of very  
693 small differences in bacterial evolution. *Int Microbiol*, 1(4), 295-300.
- 694 Baurin, S., Vercheval, L., Bouillenne, F., Falzone, C., Brans, A., Jacquamet, L., Ferrer,  
695 J. L., Sauvage, E., Dehareng, D., Frere, J. M., Charlier, P., Galleni, M., & Kerff,  
696 F. (2009). Critical role of tryptophan 154 for the activity and stability of class D  
697  $\beta$ -lactamases. *Biochemistry*, 48(47), 11252-11263.  
698 <https://doi.org/10.1021/bi901548c>
- 699 Bonomo, R. A. (2017).  $\beta$ -Lactamases: A Focus on Current Challenges. *Cold Spring*  
700 *Harb Perspect Med*, 7(1). <https://doi.org/10.1101/cshperspect.a025239>
- 701 Bush, K. (2018). Past and Present Perspectives on  $\beta$ -Lactamases. *Antimicrob Agents*  
702 *Chemother*, 62(10). <https://doi.org/10.1128/AAC.01076-18>
- 703 Bush, K., & Bradford, P. A. (2016).  $\beta$ -Lactams and  $\beta$ -Lactamase Inhibitors: An  
704 Overview. *Cold Spring Harb Perspect Med*, 6(8).  
705 <https://doi.org/10.1101/cshperspect.a025247>

- 706 Dabos, L., Bogaerts, P., Bonnin, R. A., Zavala, A., Sacre, P., Iorga, B. I., Huang, D. T.,  
707 Glupczynski, Y., & Naas, T. (2018). Genetic and Biochemical Characterization  
708 of OXA-519, a Novel OXA-48-Like  $\beta$ -Lactamase. *Antimicrob Agents*  
709 *Chemother*, 62(8). <https://doi.org/10.1128/AAC.00469-18>
- 710 Dabos, L., Zavala, A., Bonnin, R. A., Beckstein, O., Retailleau, P., Iorga, B. I., & Naas,  
711 T. (2020). Substrate Specificity of OXA-48 after  $\beta$ 5- $\beta$ 6 Loop Replacement. *ACS*  
712 *Infect Dis*, 6(5), 1032-1043. <https://doi.org/10.1021/acsinfecdis.9b00452>
- 713 Datsenko, K. A., & Wanner, B. L. (2000). One-step inactivation of chromosomal genes  
714 in *Escherichia coli* K-12 using PCR products. *Proc Natl Acad Sci U S A*, 97(12),  
715 6640-6645. <https://doi.org/10.1073/pnas.120163297>
- 716 De Luca, F., Benvenuti, M., Carboni, F., Pozzi, C., Rossolini, G. M., Mangani, S., &  
717 Docquier, J. D. (2011). Evolution to carbapenem-hydrolyzing activity in  
718 noncarbapenemase class D  $\beta$ -lactamase OXA-10 by rational protein design.  
719 *Proc Natl Acad Sci U S A*, 108(45), 18424-18429.  
720 <https://doi.org/10.1073/pnas.1110530108>
- 721 de Visser, J. A., & Rozen, D. E. (2006). Clonal interference and the periodic selection  
722 of new beneficial mutations in *Escherichia coli*. *Genetics*, 172(4), 2093-2100.  
723 <https://doi.org/10.1534/genetics.105.052373>
- 724 Docquier, J. D., Calderone, V., De Luca, F., Benvenuti, M., Giuliani, F., Bellucci, L.,  
725 Tafi, A., Nordmann, P., Botta, M., Rossolini, G. M., & Mangani, S. (2009).  
726 Crystal structure of the OXA-48  $\beta$ -lactamase reveals mechanistic diversity  
727 among class D carbapenemases. *Chem Biol*, 16(5), 540-547.  
728 <https://doi.org/10.1016/j.chembiol.2009.04.010>
- 729 Dortet, L., Oueslati, S., Jeannot, K., Tande, D., Naas, T., & Nordmann, P. (2015).  
730 Genetic and biochemical characterization of OXA-405, an OXA-48-type

- 731 extended-spectrum  $\beta$ -lactamase without significant carbapenemase activity.  
732 *Antimicrob Agents Chemother*, 59(7), 3823-3828.  
733 <https://doi.org/10.1128/AAC.05058-14>
- 734 Emsley, P., Lohkamp, B., Scott, W. G., & Cowtan, K. (2010). Features and  
735 development of Coot. *Acta Crystallogr D Biol Crystallogr*, 66(Pt 4), 486-501.  
736 <https://doi.org/10.1107/S0907444910007493>
- 737 Evans, P. R., & Murshudov, G. N. (2013). How good are my data and what is the  
738 resolution? *Acta Crystallogr D Biol Crystallogr*, 69(Pt 7), 1204-1214.  
739 <https://doi.org/10.1107/S0907444913000061>
- 740 Fournier, D., Hocquet, D., Dehecq, B., Cholley, P., & Plesiat, P. (2010). Detection of a  
741 new extended-spectrum oxacillinase in *Pseudomonas aeruginosa*. *J Antimicrob*  
742 *Chemother*, 65(2), 364-365. <https://doi.org/10.1093/jac/dkp438>
- 743 Fröhlich, C., Sørum, V., Huber, S., Samuelsen, O., Berglund, F., Kristiansson, E.,  
744 Kotsakis, S. D., Marathe, N. P., Larsson, D. G. J., & Leiros S., H. K. (2020).  
745 Structural and biochemical characterization of the environmental MBLs MYO-1,  
746 ECV-1 and SHD-1. *J Antimicrob Chemother*, 75(9), 2554-2563.  
747 <https://doi.org/10.1093/jac/dkaa175>
- 748 Fröhlich, C., Sørum, V., Thomassen, A. M., Johnsen, P. J., Leiros, H. S., & Samuelsen,  
749 Ø. (2019). OXA-48-Mediated Ceftazidime-Avibactam Resistance Is Associated  
750 with Evolutionary Trade-Offs. *mSphere*, 4(2).  
751 <https://doi.org/10.1128/mSphere.00024-19>
- 752 Gomez, S., Pasteran, F., Faccone, D., Bettiol, M., Veliz, O., De Belder, D., Rapoport,  
753 M., Gatti, B., Petroni, A., & Corso, A. (2013). Inpatient emergence of OXA-  
754 247: a novel carbapenemase found in a patient previously infected with OXA-

- 755 163-producing *Klebsiella pneumoniae*. *Clin Microbiol Infect*, 19(5), E233-235.  
756 <https://doi.org/10.1111/1469-0691.12142>
- 757 Grand, S. L., W.Götz, A., & C.Walker, R. (2013). SPFP: Speed without compromise—  
758 A mixed precision model for GPU accelerated molecular dynamics simulations.  
759 *Computer Physics Communications*, 184(2), 374-380.  
760 <https://doi.org/https://doi.org/10.1016/j.cpc.2012.09.022>
- 761 Gullberg, E., Albrecht, L. M., Karlsson, C., Sandegren, L., & Andersson, D. I. (2014).  
762 Selection of a multidrug resistance plasmid by sublethal levels of antibiotics and  
763 heavy metals. *MBio*, 5(5), e01918-01914. [https://doi.org/10.1128/mBio.01918-](https://doi.org/10.1128/mBio.01918-14)  
764 [14](https://doi.org/10.1128/mBio.01918-14)
- 765 Gullberg, E., Cao, S., Berg, O. G., Ilback, C., Sandegren, L., Hughes, D., & Andersson,  
766 D. I. (2011). Selection of resistant bacteria at very low antibiotic concentrations.  
767 *PLoS Pathog*, 7(7), e1002158. <https://doi.org/10.1371/journal.ppat.1002158>
- 768 Hirvonen, V. H. A., Mulholland, A. J., Spencer, J., & van der Kamp, M. W. (2020). Small  
769 Changes in Hydration Determine Cephalosporinase Activity of OXA-48  $\beta$ -  
770 Lactamases. *ACS Catalysis*, 10(11), 6188-6196.  
771 <https://doi.org/10.1021/acscatal.0c00596>
- 772 Jensen, P. R., & Hammer, K. (1998). Artificial promoters for metabolic optimization.  
773 *Biotechnol Bioeng*, 58(2-3), 191-195.
- 774 Kabsch, W. (2010). Xds. *Acta Crystallogr D Biol Crystallogr*, 66(Pt 2), 125-132.  
775 <https://doi.org/10.1107/S0907444909047337>
- 776 Kayikci, M., Venkatakrishnan, A. J., Scott-Brown, J., Ravarani, C. N. J., Flock, T., &  
777 Babu, M. M. (2018). Visualization and analysis of non-covalent contacts using  
778 the Protein Contacts Atlas. *Nat Struct Mol Biol*, 25(2), 185-194.  
779 <https://doi.org/10.1038/s41594-017-0019-z>

- 780 Levitt, P. S., Papp-Wallace, K. M., Taracila, M. A., Hujer, A. M., Winkler, M. L., Smith,  
781 K. M., Xu, Y., Harris, M. E., & Bonomo, R. A. (2012). Exploring the role of a  
782 conserved class A residue in the  $\Omega$ -Loop of KPC-2  $\beta$ -lactamase: a mechanism  
783 for ceftazidime hydrolysis. *J Biol Chem*, 287(38), 31783-31793.  
784 <https://doi.org/10.1074/jbc.M112.348540>
- 785 Lund, B. A., Christopeit, T., Guttormsen, Y., Bayer, A., & Leiros, H. K. (2016).  
786 Screening and Design of Inhibitor Scaffolds for the Antibiotic Resistance  
787 Oxacillinase-48 (OXA-48) through Surface Plasmon Resonance Screening. *J*  
788 *Med Chem*, 59(11), 5542-5554.  
789 <https://doi.org/10.1021/acs.jmedchem.6b00660>
- 790 Lund, B. A., Thomassen, A. M., Carlsen, T. J. O., & Leiros, H. K. S. (2017). Structure,  
791 activity and thermostability investigations of OXA-163, OXA-181 and OXA-245  
792 using biochemical analysis, crystal structures and differential scanning  
793 calorimetry analysis. *Acta Crystallogr F Struct Biol Commun*, 73(Pt 10), 579-  
794 587. <https://doi.org/10.1107/S2053230X17013838>
- 795 Maier, J. A., Martinez, C., Kasavajhala, K., Wickstrom, L., Hauser, K. E., & Simmerling,  
796 C. (2015). ff14SB: Improving the Accuracy of Protein Side Chain and Backbone  
797 Parameters from ff99SB. *J Chem Theory Comput*, 11(8), 3696-3713.  
798 <https://doi.org/10.1021/acs.jctc.5b00255>
- 799 Mairi, A., Pantel, A., Sotto, A., Lavigne, J. P., & Touati, A. (2018). OXA-48-like  
800 carbapenemases producing *Enterobacteriaceae* in different niches. *Eur J Clin*  
801 *Microbiol Infect Dis*, 37(4), 587-604. [https://doi.org/10.1007/s10096-017-3112-](https://doi.org/10.1007/s10096-017-3112-7)  
802 [7](https://doi.org/10.1007/s10096-017-3112-7)
- 803 Mehta, S. C., Rice, K., & Palzkill, T. (2015). Natural Variants of the KPC-2  
804 Carbapenemase have Evolved Increased Catalytic Efficiency for Ceftazidime

- 805 Hydrolysis at the Cost of Enzyme Stability. *PLoS Pathog*, 11(6), e1004949.  
806 <https://doi.org/10.1371/journal.ppat.1004949>
- 807 Meziane-Cherif, D., Bonnet, R., Haouz, A., & Courvalin, P. (2016). Structural insights  
808 into the loss of penicillinase and the gain of ceftazidimase activities by OXA-145  
809  $\beta$ -lactamase in *Pseudomonas aeruginosa*. *J Antimicrob Chemother*, 71(2), 395-  
810 402. <https://doi.org/10.1093/jac/dkv375>
- 811 Murray, A. K., Zhang, L., Yin, X., Zhang, T., Buckling, A., Snape, J., & Gaze, W. H.  
812 (2018). Novel Insights into Selection for Antibiotic Resistance in Complex  
813 Microbial Communities. *mBio*, 9(4). <https://doi.org/10.1128/mBio.00969-18>
- 814 Naas, T., Oueslati, S., Bonnin, R. A., Dabos, M. L., Zavala, A., Dortet, L., Retailleau,  
815 P., & Iorga, B. I. (2017).  $\beta$ -lactamase database (BLDB) - structure and function.  
816 *J Enzyme Inhib Med Chem*, 32(1), 917-919.  
817 <https://doi.org/10.1080/14756366.2017.1344235>
- 818 Negri, M. C., Lipsitch, M., Blazquez, J., Levin, B. R., & Baquero, F. (2000).  
819 Concentration-dependent selection of small phenotypic differences in TEM  $\beta$ -  
820 lactamase-mediated antibiotic resistance. *Antimicrob Agents Chemother*, 44(9),  
821 2485-2491. <https://doi.org/10.1128/aac.44.9.2485-2491.2000>
- 822 Oueslati, S., Retailleau, P., Marchini, L., Berthault, C., Dortet, L., Bonnin, R. A., Iorga,  
823 B. I., & Naas, T. (2020). Role of Arginine 214 in the Substrate Specificity of  
824 OXA-48. *Antimicrob Agents Chemother*, 64(5).  
825 <https://doi.org/10.1128/AAC.02329-19>
- 826 Pitout, J. D. D., Peirano, G., Kock, M. M., Strydom, K. A., & Matsumura, Y. (2019). The  
827 Global Ascendency of OXA-48-Type Carbapenemases. *Clin Microbiol Rev*,  
828 33(1). <https://doi.org/10.1128/CMR.00102-19>

- 829 Poirel, L., Castanheira, M., Carrer, A., Rodriguez, C. P., Jones, R. N., Smayevsky, J.,  
830 & Nordmann, P. (2011). OXA-163, an OXA-48-related class D  $\beta$ -lactamase with  
831 extended activity toward expanded-spectrum cephalosporins. *Antimicrob*  
832 *Agents Chemother*, 55(6), 2546-2551. <https://doi.org/10.1128/AAC.00022-11>
- 833 Poirel, L., Heritier, C., Tolun, V., & Nordmann, P. (2004). Emergence of oxacillinase-  
834 mediated resistance to imipenem in *Klebsiella pneumoniae*. *Antimicrob Agents*  
835 *Chemother*, 48(1), 15-22.
- 836 Preston, K. E., Hitchcock, S. A., Aziz, A. Y., & Tine, J. A. (2014). The complete  
837 nucleotide sequence of the multi-drug resistance-encoding IncL/M plasmid  
838 pACM1. *Plasmid*, 76, 54-65. <https://doi.org/10.1016/j.plasmid.2014.08.005>
- 839 RCoreTeam. (2018). R: A language and environment for statistical computing, Vienna,  
840 Austria. *R Foundation for Statistical Computing*.
- 841 Ribeiro, A. R., Sures, B., & Schmidt, T. C. (2018). Cephalosporin antibiotics in the  
842 aquatic environment: A critical review of occurrence, fate, ecotoxicity and  
843 removal technologies. *Environ Pollut*, 241, 1153-1166.  
844 <https://doi.org/10.1016/j.envpol.2018.06.040>
- 845 Roe, D. R., & Cheatham, T. E., 3rd. (2013). PTRAJ and CPPTRAJ: Software for  
846 Processing and Analysis of Molecular Dynamics Trajectory Data. *J Chem*  
847 *Theory Comput*, 9(7), 3084-3095. <https://doi.org/10.1021/ct400341p>
- 848 Rubenstein, A. B., Blacklock, K., Nguyen, H., Case, D. A., & Khare, S. D. (2018).  
849 Systematic Comparison of Amber and Rosetta Energy Functions for Protein  
850 Structure Evaluation. *J Chem Theory Comput*, 14(11), 6015-6025.  
851 <https://doi.org/10.1021/acs.jctc.8b00303>
- 852 Salomon-Ferrer, R., Gotz, A. W., Poole, D., Le Grand, S., & Walker, R. C. (2013).  
853 Routine Microsecond Molecular Dynamics Simulations with AMBER on GPUs.

- 854 2. Explicit Solvent Particle Mesh Ewald. *J Chem Theory Comput*, 9(9), 3878-  
855 3888. <https://doi.org/10.1021/ct400314y>
- 856 Samuelsen, Ø., Naseer, U., Karah, N., Lindemann, P. C., Kanestrom, A., Leegaard, T.  
857 M., & Sundsfjord, A. (2013). Identification of *Enterobacteriaceae* isolates with  
858 OXA-48 and coproduction of OXA-181 and NDM-1 in Norway. *J Antimicrob*  
859 *Chemother*, 68(7), 1682-1685. <https://doi.org/10.1093/jac/dkt058>
- 860 Shields, R. K., Chen, L., Cheng, S., Chavda, K. D., Press, E. G., Snyder, A., Pandey,  
861 R., Doi, Y., Kreiswirth, B. N., Nguyen, M. H., & Clancy, C. J. (2017). Emergence  
862 of Ceftazidime-Avibactam Resistance Due to Plasmid-Borne *bla*<sub>KPC-3</sub> Mutations  
863 during Treatment of Carbapenem-Resistant *Klebsiella pneumoniae* Infections.  
864 *Antimicrob Agents Chemother*, 61(3). <https://doi.org/10.1128/AAC.02097-16>
- 865 Shields, R. K., Nguyen, M. H., Press, E. G., Chen, L., Kreiswirth, B. N., & Clancy, C.  
866 J. (2017). In Vitro Selection of Meropenem Resistance among Ceftazidime-  
867 Avibactam-Resistant, Meropenem-Susceptible *Klebsiella pneumoniae* Isolates  
868 with Variant KPC-3 Carbapenemases. *Antimicrob Agents Chemother*, 61(5).  
869 <https://doi.org/10.1128/AAC.00079-17>
- 870 Stojanoski, V., Chow, D. C., Hu, L., Sankaran, B., Gilbert, H. F., Prasad, B. V., &  
871 Palzkill, T. (2015). A triple mutant in the  $\Omega$ -loop of TEM-1  $\beta$ -lactamase changes  
872 the substrate profile via a large conformational change and an altered general  
873 base for catalysis. *J Biol Chem*, 290(16), 10382-10394.  
874 <https://doi.org/10.1074/jbc.M114.633438>
- 875 Tacao, M., Correia, A., & Henriques, I. S. (2015). Low Prevalence of Carbapenem-  
876 Resistant Bacteria in River Water: Resistance Is Mostly Related to Intrinsic  
877 Mechanisms. *Microb Drug Resist*, 21(5), 497-506.  
878 <https://doi.org/10.1089/mdr.2015.0072>



- 879 Tacao, M., Silva, I., & Henriques, I. (2017). Culture-independent methods reveal high  
880 diversity of OXA-48-like genes in water environments. *J Water Health*, 15(4),  
881 519-525. <https://doi.org/10.2166/wh.2017.260>
- 882 Thomas, V. L., McReynolds, A. C., & Shoichet, B. K. (2010). Structural bases for  
883 stability-function tradeoffs in antibiotic resistance. *J Mol Biol*, 396(1), 47-59.  
884 <https://doi.org/10.1016/j.jmb.2009.11.005>
- 885 Thomason, L. C., Costantino, N., & Court, D. L. (2007). *E. coli* genome manipulation  
886 by P1 transduction. *Curr Protoc Mol Biol*, Chapter 1, Unit 1 17.  
887 <https://doi.org/10.1002/0471142727.mb0117s79>
- 888 Venditti, C., Nisii, C., Ballardini, M., Meledandri, M., & Di Caro, A. (2019). Identification  
889 of L169P mutation in the  $\Omega$  loop of KPC-3 after a short course of  
890 ceftazidime/avibactam. *J Antimicrob Chemother*, 74(8), 2466-2467.  
891 <https://doi.org/10.1093/jac/dkz201>
- 892 Watkinson, A. J., Murby, E. J., Kolpin, D. W., & Costanzo, S. D. (2009). The occurrence  
893 of antibiotics in an urban watershed: from wastewater to drinking water. *Sci*  
894 *Total Environ*, 407(8), 2711-2723.  
895 <https://doi.org/10.1016/j.scitotenv.2008.11.059>
- 896 Westhoff, S., van Leeuwe, T. M., Qachach, O., Zhang, Z., van Wezel, G. P., & Rozen,  
897 D. E. (2017). The evolution of no-cost resistance at sub-MIC concentrations of  
898 streptomycin in *Streptomyces coelicolor*. *ISME J*, 11(5), 1168-1178.  
899 <https://doi.org/10.1038/ismej.2016.194>
- 900 Yurtsev, E. A., Chao, H. X., Datta, M. S., Artemova, T., & Gore, J. (2013). Bacterial  
901 cheating drives the population dynamics of cooperative antibiotic resistance  
902 plasmids. *Mol Syst Biol*, 9, 683. <https://doi.org/10.1038/msb.2013.39>

903 Zheng, J., Payne, J. L., & Wagner, A. (2019). Cryptic genetic variation accelerates  
904 evolution by opening access to diverse adaptive peaks. *Science*, 365(6451),  
905 347-353. <https://doi.org/10.1126/science.aax1837>  
906

907 **Table 1.** MIC (mg/L) of OXA-48 and allele variants expressed in the high copy number vector pCR-Blunt II-TOPO in *E. coli* TOP10

| <b>Antimicrobial agents<sup>a</sup></b> | <b>MP13-04</b> | <b>MP13-11<br/>wild-type<br/>OXA-48</b> | <b>MP13-21<br/>L67F</b> | <b>MP13-16<br/>P68S</b> | <b>MP13-14<br/>F72L</b> | <b>MP13-17<br/>F156C</b> | <b>MP13-18<br/>F156V</b> | <b>MP13-15<br/>L158P</b> | <b>MP13-19<br/>G160C</b> | <b>MP13-33<br/>F72L/<br/>G131S</b> | <b>MP13-20<br/>N146S/<br/>L158P</b> |
|-----------------------------------------|----------------|-----------------------------------------|-------------------------|-------------------------|-------------------------|--------------------------|--------------------------|--------------------------|--------------------------|------------------------------------|-------------------------------------|
| Temocillin                              | 16             | 256                                     | 64                      | 64                      | 64                      | 16                       | 16                       | 64                       | 16                       | 16                                 | 32                                  |
| Piperacillin/tazobactam                 | 2              | 64                                      | 2                       | 2                       | 2                       | 2                        | 2                        | 2                        | 2                        | 2                                  | 2                                   |
| Amoxicillin/clavulanic acid             | 4              | 128                                     | 128                     | 64                      | 64                      | 16                       | 64                       | 16                       | 8                        | 8                                  | 8                                   |
| Ceftazidime                             | 0.5            | 0.5                                     | 1                       | 8                       | 4                       | 0.5                      | 0.5                      | 8                        | 0.5                      | 0.5                                | 2                                   |
| Ceftazidime/avibactam                   | 0.25           | 0.25                                    | 0.5                     | 0.25                    | 0.5                     | 0.5                      | 0.5                      | 0.5                      | 0.5                      | 0.25                               | 0.5                                 |
| Cefuroxime                              | 16             | 16                                      | 8                       | 16                      | 8                       | 8                        | 8                        | 8                        | 8                        | 16                                 | 8                                   |
| Cefepime                                | 0.06           | 0.12                                    | 0.06                    | 0.12                    | 0.12                    | 0.06                     | 0.06                     | 0.25                     | 0.06                     | 0.06                               | 0.12                                |
| Cefotaxime                              | 0.12           | 0.25                                    | 0.12                    | 0.12                    | 0.12                    | 0.12                     | 0.12                     | 0.25                     | 0.12                     | 0.25                               | 0.12                                |
| Meropenem                               | 0.03           | 0.25                                    | 0.12                    | 0.03                    | 0.03                    | 0.03                     | 0.03                     | 0.03                     | 0.03                     | 0.03                               | 0.03                                |
| Imipenem                                | 0.25           | 1                                       | 0.25                    | 0.25                    | 0.25                    | 0.25                     | 0.25                     | 0.25                     | 0.25                     | 0.25                               | 0.5                                 |
| Ertapenem                               | 0.015          | 1                                       | 0.12                    | 0.03                    | 0.03                    | 0.015                    | 0.015                    | 0.06                     | 0.015                    | 0.015                              | 0.015                               |
| Doripenem                               | 0.03           | 0.03                                    | 0.03                    | 0.03                    | 0.06                    | 0.03                     | 0.03                     | 0.06                     | 0.03                     | 0.06                               | 0.06                                |

908 <sup>a</sup> tazobactam fixed at 4 µg/mL; clavulanic acid fixed at 2 µg/mL; avibactam fixed at 4 µg/mL

909 **Table 2.** Overview of enzyme kinetic values, molecular weight and thermal stability of OXA-48 and variants.

| OXA-48 variants              | Calculated molecular weight <sup>a</sup> [Da] | Measured molecular weight <sup>a</sup> [Da] | Stability <sup>b</sup> [°C] | $k_{cat}/K_M$ [mM <sup>-1</sup> s <sup>-1</sup> ] |                       |                       |                        |                        |                        |
|------------------------------|-----------------------------------------------|---------------------------------------------|-----------------------------|---------------------------------------------------|-----------------------|-----------------------|------------------------|------------------------|------------------------|
|                              |                                               |                                             |                             | Ampicillin                                        | Piperacillin          | Ceftazidime           | Cefepime               | Imipenem               | Meropenem              |
| wild-type                    | 28,186.3                                      | 28,186.5                                    | 55.9                        | 5.56 x10 <sup>3</sup>                             | 2.26 x10 <sup>3</sup> | 3.4 x10 <sup>-1</sup> | 1.20 x10 <sup>-1</sup> | 1.05 x10 <sup>2</sup>  | 4.58 x10 <sup>1</sup>  |
| L67F                         | 28,220.3                                      | 28,220.4                                    | 51.4                        | 4.66 x10 <sup>2</sup>                             | 7.80 x10 <sup>0</sup> | 9.4 x10 <sup>-1</sup> | 1.68 x10 <sup>-2</sup> | 6.38 x10 <sup>0</sup>  | 7.81 x10 <sup>-1</sup> |
| P68S                         | 28,176.3                                      | 28,176.3                                    | 48.3                        | 1.80 x10 <sup>2</sup>                             | 1.48 x10 <sup>1</sup> | 1.6 x10 <sup>0</sup>  | 9.12 x10 <sup>-2</sup> | 3.56 x10 <sup>0</sup>  | 3.20 x10 <sup>0</sup>  |
| F72L                         | 28,152.3                                      | 28,151.5                                    | 49.2                        | 1.44 x10 <sup>2</sup>                             | 1.35 x10 <sup>1</sup> | 1.1 x10 <sup>1</sup>  | 8.81 x10 <sup>-3</sup> | 3.38 x10 <sup>0</sup>  | 4.47 x10 <sup>0</sup>  |
| F156C <sup>c</sup>           | 28,142.3                                      | 28,218.3                                    | 50.7                        | 2.24 x10 <sup>2</sup>                             | 9.39 x10 <sup>0</sup> | 1.5 x10 <sup>0</sup>  | 2.42 x10 <sup>-2</sup> | 8.17 x10 <sup>-2</sup> | 6.54 x10 <sup>-2</sup> |
| F156V                        | 28,138.3                                      | 28,138.5                                    | 50.2                        | 1.18 x10 <sup>2</sup>                             | 9.03 x10 <sup>0</sup> | 1.5 x10 <sup>0</sup>  | 3.35 x10 <sup>-2</sup> | 2.85 x10 <sup>0</sup>  | 6.10 x10 <sup>-1</sup> |
| L158P                        | 28,170.3                                      | 28,170.5                                    | 50.3                        | 2.37 x10 <sup>2</sup>                             | 2.69 x10 <sup>1</sup> | 6.7 x10 <sup>-1</sup> | ND                     | 1.38 x10 <sup>0</sup>  | 4.56 x10 <sup>-1</sup> |
| G160C <sup>c</sup>           | 28,232.3                                      | 28,308.3                                    | 48.4                        | 2.24 x10 <sup>2</sup>                             | 1.40 x10 <sup>1</sup> | 3.6 x10 <sup>0</sup>  | 1.27 x10 <sup>-1</sup> | 4.36 x10 <sup>0</sup>  | 6.52 x10 <sup>0</sup>  |
| F72L/<br>G131S <sup>d</sup>  | 28,182.3                                      | 28,182.0                                    | 45.2                        | 1.46 x10 <sup>2</sup>                             | 3.07 x10 <sup>1</sup> | 5.9 x10 <sup>-1</sup> | 1.27 x10 <sup>-1</sup> | 2.03 x10 <sup>0</sup>  | 8.94 x10 <sup>0</sup>  |
| N146S/<br>L158P <sup>d</sup> | 28,143.3                                      | 28,142.0                                    | 50.7                        | 2.05 x10 <sup>2</sup>                             | 2.87 x10 <sup>1</sup> | 6.9 x10 <sup>1</sup>  | ND                     | 3.02 x10 <sup>-1</sup> | 5.76 x10 <sup>-1</sup> |

910 <sup>a</sup> monoisotopic mass after TEV cleavage

911 <sup>b</sup> measured as thermostability

912 <sup>c</sup> purified in the presence of β-mercaptoethanol to increase solubility

913 <sup>d</sup>second mutations (G131S and N146S) described in environmental samples

914 <sup>ND</sup>no activity detected
